# Supplementary figures and images for: Study on the Influence of Sponge Road Bioretention Facility on the Stability of Subgrade Slope
Source: MDPI journal article supplement (doi:10.3390/w13233466), 2021-12-06

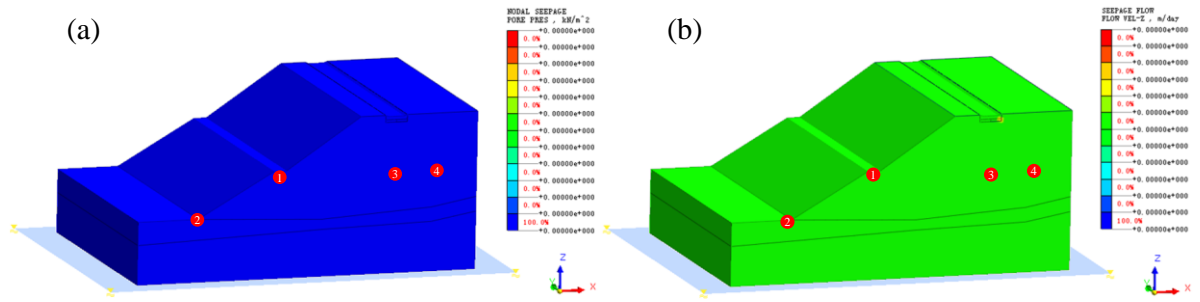

**Figure S1** Initial pore water pressure and water flow rate distribution diagram

Supplement: s1 [file s1]
